# Supplementary material for: The role of atmospheric rivers in compound events consisting of heavy precipitation and high storm surges along the Dutch coast
Source: Copernicus journal article supplement (doi:10.5194/nhess-18-3311-2018), 2018-12-14
Supplement: Supplementary file 1 [file nhess-18-3311-2018-supplement.zip]

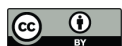

*Supplement of*

**The role of atmospheric rivers in compound events consisting of heavy precipitation and high storm surges along the Dutch coast**

**Nina Ridder et al.**

*Correspondence to:* Nina Ridder ([ridder@knmi.nl](mailto:ridder@knmi.nl))

- [nhess-18-3311-2018-supplement-title-page.pdf](#)
- [figS01.eps](#)
- [figS02.eps](#)

The copyright of individual parts of the supplement might differ from the CC BY 4.0 License.
